# Supplementary figures and images for: Ångstrom-scale silver particles potently combat SARS-CoV-2 infection by suppressing the ACE2 expression and inflammatory responses
Source: Royal Society of Chemistry journal article supplement (doi:10.1039/d2tb00336h), 2022-01-01

ACE2

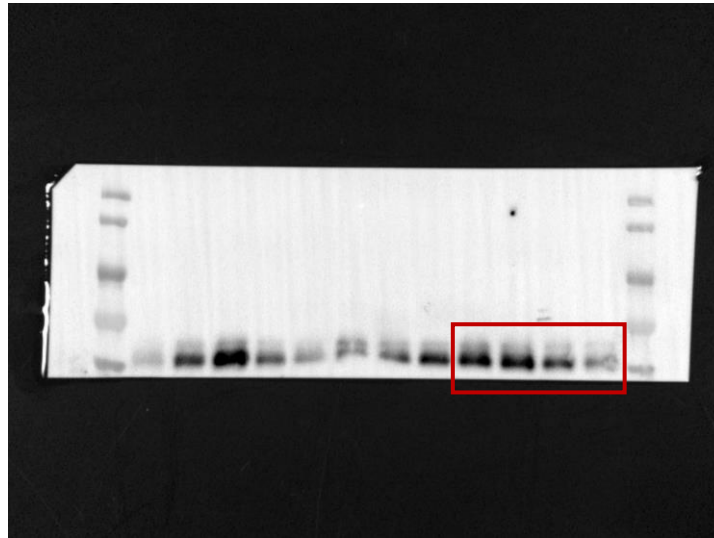

150 kDa  
130 kDa  
100 kDa  
70 kDa  
55 kDa

$\beta$ -actin

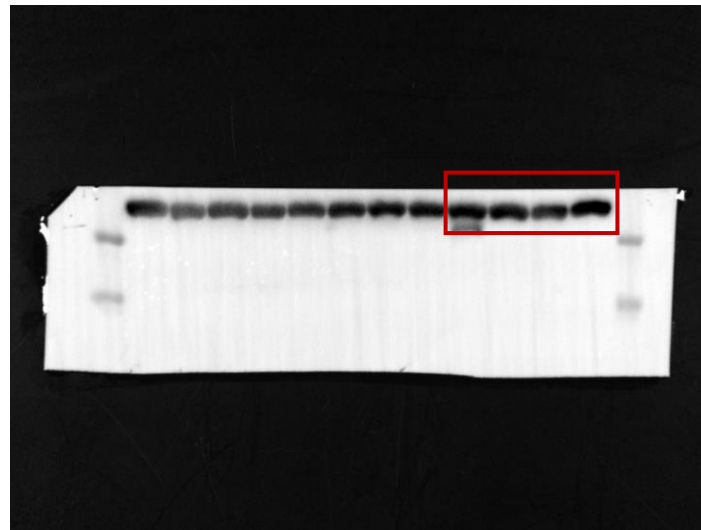

40 kDa  
35 kDa

Supplement: d2tb00336h1.zip [file d2tb00336h1.zip]
